# Supplementary material for: Dynamic Assay for Profiling Anti-SARS-CoV-2 Antibodies and Their ACE2/Spike RBD Neutralization Capacity
Source: MDPI journal article supplement (doi:10.3390/v13071371), 2021-07-15
Supplement: s1 [file s1]

**Table S1.** Summary of clinical information on SARS-CoV-2 positive patients

| Variable         |          | N=(91) | (%)  |
|------------------|----------|--------|------|
| Sex              | Male     | 45     | 49.5 |
|                  | Female   | 46     | 50.5 |
| Age              | Median   | 53     |      |
|                  | Range    | 19-84  |      |
| Disease Severity | Mild     | 46     | 50.5 |
|                  | Moderate | 13     | 14.3 |
|                  | Severe   | 32     | 35.2 |
